# Supplementary material for: UVB-Induced Tumor Heterogeneity Diminishes Immune Response in Melanoma
Source: PubMed Central journal article supplement — Cell. 2019 Sep 19;179(1):219–235.e21. doi: 10.1016/j.cell.2019.08.032 (PMC6863386; doi:10.1016/j.cell.2019.08.032), 2019-09-19
Supplement: mmc1.pdf [file mmc1.pdf]

## Supplemental Information

### UVB-Induced Tumor Heterogeneity Diminishes

#### Immune Response in Melanoma

**Yochai Wolf, Osnat Bartok, Sushant Patkar, Gitit Bar Eli, Sapir Cohen, Kevin Litchfield, Ronen Levy, Alejandro Jiménez-Sánchez, Sophie Trabish, Joo Sang Lee, Hiren Karathia, Eilon Barnea, Chi-Ping Day, Einat Cinnamon, Ilan Stein, Adam Solomon, Lital Bitton, Eva Pérez-Guijarro, Tania Dubovik, Shai S. Shen-Orr, Martin L. Miller, Glenn Merlino, Yishai Levin, Eli Pikarsky, Lea Eisenbach, Arie Admon, Charles Swanton, Eytan Ruppin, and Yardena Samuels**

## TABLES WITH TITLES AND LEGENDS

**Supplementary Table 1. WES bioinformatics analysis for all cell lines.  
Related to Figures 2 and 5.**

| Description    | Mutation Load (SNV genomic mutations) | Clonal SNV Fraction | Number of predicted neoantigens, affinity<500nM (non-redundant) | Average affinity | Average Hydrophobicity (KyteDoolittle scale) |
|----------------|---------------------------------------|---------------------|-----------------------------------------------------------------|------------------|----------------------------------------------|
| Parental B2905 | 2745                                  | 0.079               | 296                                                             | 233.637          | 0.712                                        |
| UVB B2905      | 5479                                  | 0.063               | 302                                                             | 228.673          | 0.672                                        |
| UVB.2          | 9602                                  | 0.053               | 607                                                             | 2086.41          | 0.621                                        |
| UVB.3          | 7977                                  | 0.031               | 417                                                             | 2196.95          | 0.645                                        |
| SCC 1          | 3600                                  | 0.846               | 383                                                             | 231.004          | 0.637                                        |
| SCC 2          | 3720                                  | 0.887               | 137                                                             | 219.252          | 0.604                                        |
| SCC 3          | 9810                                  | 0.901               | 329                                                             | 242.262          | 0.702                                        |
| SCC 4          | 4721                                  | 0.824               | 163                                                             | 244.195          | 0.762                                        |
| SCC 5          | 9999                                  | 0.893               | 348                                                             | 238.34           | 0.687                                        |
| SCC 6          | 10405                                 | 0.874               | 346                                                             | 239.534          | 0.754                                        |
| SCC 7          | 13082                                 | 0.553               | 500                                                             | 237.742          | 0.674                                        |
| SCC 8          | 5652                                  | 0.798               | 177                                                             | 214.352          | 0.534                                        |
| SCC 9          | 11919                                 | 0.294               | 500                                                             | 230.336          | 0.699                                        |
| SCC 10         | 9804                                  | 0.877               | 350                                                             | 234.973          | 0.678                                        |
| SCC 11         | 4796                                  | 0.811               | 172                                                             | 229.577          | 0.560                                        |
| SCC 12         | 10510                                 | 0.877               | 408                                                             | 240.755          | 0.771                                        |
| SCC 13         | 10126                                 | 0.843               | 391                                                             | 236.153          | 0.739                                        |
| SCC 14         | 10103                                 | 0.894               | 334                                                             | 246.734          | 0.868                                        |
| SCC 15         | 12401                                 | 0.866               | 431                                                             | 236.538          | 0.693                                        |
| SCC 16         | 4208                                  | 0.848               | 144                                                             | 235.044          | 0.704                                        |
| SCC 17         | 10502                                 | 0.869               | 378                                                             | 226.87           | 0.695                                        |
| SCC 18         | 13134                                 | 0.657               | 498                                                             | 239.086          | 0.705                                        |
| SCC 19         | 11126                                 | 0.830               | 376                                                             | 243.846          | 0.732                                        |
| SCC 20         | 9497                                  | 0.886               | 361                                                             | 236.804          | 0.730                                        |
| SCC 21         | 11931                                 | 0.882               | 425                                                             | 236.145          | 0.661                                        |
| SCC 22         | 16977                                 | 0.496               | 643                                                             | 233.478          | 0.665                                        |

**Supplementary Table 2. Exonic mutations added to B2905 cell line following UVB irradiation, Related to Figure 2.**

| <b>Mutation Type</b> | <b>Parental B2905</b> | <b>UVB B2905</b> | <b>Mutations added to UVB line</b> |
|----------------------|-----------------------|------------------|------------------------------------|
| T>G                  | 243                   | 234              | 189                                |
| T>C                  | 1235                  | 695              | 451                                |
| T>A                  | 197                   | 580              | 538                                |
| C>A                  | 212                   | 436              | 405                                |
| C>G                  | 76                    | 100              | 88                                 |
| C>T                  | 782                   | 3434             | 3212                               |

**Supplementary Table 3. Peptide information, clone numbers in which they were found, MHC binding information. Related to Figure 5.**

| Gene name | MS peptide hit    | DNA Change           | Protein change | Clone number                   | Binding score | RMA-S binding |
|-----------|-------------------|----------------------|----------------|--------------------------------|---------------|---------------|
| DNM2      | <b>FAIFNTEQM</b>  | g.chr9:21499367G>T   | p.R594M        | SCC14                          | 263.91        | H2-Db         |
| SGTA      | <b>AGLLNSPHFI</b> | g.chr10:81048399T>C  | p.N228S        | SCC12                          | 146.88        | H2-Db         |
| PAPD5     | <b>QAFDFAYV</b>   | g.chr8:88252012A>T   | p.Y447F        | SCC17                          | 119.57        | H2-Kb         |
| NSD3      | <b>KGVGNKTEI</b>  | g.chr8:25666033A>G   | p.I539V        | SCC3,<br>5,14,15,18,1<br>9, 22 | 118.91        | Not tested    |
| IFI44     | <b>ASLTHVDSL</b>  | g.chr3:151738305T>C  | p.L338S        | SCC2                           | 114.45        | H2-Db         |
| POLK      | <b>LANETISTL</b>  | g.chr13:96483724T>G  | p.E736A        | SCC3, 4, 5,<br>9, 15, 16, 19   | 111.29        | Weak binder   |
| NUP98     | <b>VINENYDYL</b>  | g.chr7:102123687T>C  | p.I1658V       | SCC17                          | 107.01        | H2-Db         |
| RPTOR     | <b>SAYEKLYSL</b>  | g.chr11:119846903C>T | p.H180Y        | SCC2                           | 95.04         | H2-Db         |
| CHRD2     | <b>IGIYHLVQI</b>  | g.chr7:100029349A>T  | p.K376I        | SCC9                           | 91.9          | Not tested    |
| VPS35     | <b>HQNVNVENI</b>  | g.chr8:85281264T>C   | p.K296E        | SCC9                           | 86.136        | H2-Db         |
| KCNH2     | <b>VSLNTNSEKI</b> | g.chr5:24325544G>A   | p.P634L        | SCC11                          | 80.755        | Not tested    |
| KEAP1     | <b>FGVMNELHL</b>  | g.chr9:21237498C>T   | p.R71H         | SCC5                           | 80.165        | Not tested    |
| SMC4      | <b>SAITMAQV</b>   | g.chr3:69030402A>T   | p.K920M        | SCC9, 17                       | 78.616        | Not tested    |
| OLFR204   | <b>SVTLFYGTL</b>  | g.chr16:59314664A>T  | p.S248T        | SCC15                          | 73.26         | Not tested    |
| PA2G4     | <b>VAHIFVIGV</b>  | g.chr10:128563088G>A | p.T124I        | SCC13,18                       | 70.912        | H2-Kb         |
| TMEM135   | <b>SMYLVSKL</b>   | g.chr7:89147986G>A   | p.A354V        | SCC5                           | 49.715        | Non binder    |
| VWA8      | <b>FAALLRYSI</b>  | g.chr14:78949545G>A  | p.G464R        | SCC9                           | 42.311        | Non binder    |
| TMEM147   | <b>VIYDFIGEF</b>  | g.chr7:30728676C>A   | p.G63V         | SCC17                          | 40.103        | Not tested    |

**Supplementary Table 4. Multivariate cox regression analysis to test if ITH remains associated with overall survival in immune checkpoint inhibitor treated cohorts, while controlling for tumor purity as a confounding factor. Related to Figure 7.**

| ITH                                                               |         |                                    |                   |                     |             |
|-------------------------------------------------------------------|---------|------------------------------------|-------------------|---------------------|-------------|
| $\lambda(t) = \lambda(t) \exp(\beta_1 * ITH + \beta_2 * purity )$ |         |                                    |                   |                     |             |
| Study                                                             | feature | exp(coefficient)<br>(Hazard Ratio) | standard<br>error | Wald's<br>statistic | p-value     |
| Snyder                                                            | ITH     | 9.464                              | 0.8258            | 2.722               | 0.0065      |
| Snyder                                                            | purity  | 4.9392                             | 0.8798            | 1.815               | 0.0695      |
| Study                                                             | feature | exp(coefficient)<br>(Hazard Ratio) | standard<br>error | Wald's<br>statistic | p-value     |
| Riaz                                                              | ITH     | 2.1505                             | 0.5166            | 1.482               | 0.138       |
| Riaz                                                              | purity  | 1.1262                             | 0.7208            | 0.165               | 0.869       |
| Study                                                             | feature | exp(coefficient)<br>(Hazard Ratio) | standard<br>error | Wald's<br>statistic | p-value     |
| Hugo                                                              | ITH     | 3.976                              | 0.8822            | 1.565               | 0.118       |
| Hugo                                                              | purity  | 0.5031                             | 1.3864            | -0.495              | 0.620       |
| Study                                                             | feature | exp(coefficient)<br>(Hazard Ratio) | standard<br>error | Wald's<br>statistic | p-value     |
| Van Allen                                                         | ITH     | 0.7551                             | 0.4365            | -0.644              | 0.5199      |
| Van Allen                                                         | purity  | 5.3141                             | 0.9066            | 1.842               | 0.0654      |
| Study                                                             | feature | exp(coefficient)<br>(Hazard Ratio) | standard<br>error | Wald's<br>statistic | Pmeta-value |
| Meta-Analysis                                                     | ITH     | -                                  | -                 | -                   | 0.01189     |
| Meta-Analysis                                                     | purity  | -                                  | -                 | -                   | 0.15013     |

**Supplementary Table 5. Multivariate cox regression analysis to test if ITH remains associated with overall survival in immune checkpoint inhibitor treated cohorts, while controlling for tumor mutation burden as a confounding factor. Related to Figure 7.**

| <b>Study</b>  | <b>feature</b> | <b>exp(coefficient)<br/>(Hazard Ratio)</b> | <b>standard<br/>error</b> | <b>Wald's<br/>statistic</b> | <b>p-value</b>     |
|---------------|----------------|--------------------------------------------|---------------------------|-----------------------------|--------------------|
| Snyder        | ITH            | 6.3696061                                  | 0.8762292                 | 2.113                       | 0.0346             |
| Snyder        | TMB            | 0.9998089                                  | 0.0002168                 | -0.882                      | 0.378              |
| <b>Study</b>  | <b>feature</b> | <b>exp(coefficient)<br/>(Hazard Ratio)</b> | <b>standard<br/>error</b> | <b>Wald's<br/>statistic</b> | <b>p-value</b>     |
| Riaz          | ITH            | 1.9905849                                  | 0.4660073                 | 1.477                       | 0.14               |
| Riaz          | TMB            | 0.9994318                                  | 0.0005463                 | -1.04                       | 0.298              |
| <b>Study</b>  | <b>feature</b> | <b>exp(coefficient)<br/>(Hazard Ratio)</b> | <b>standard<br/>error</b> | <b>Wald's<br/>statistic</b> | <b>p-value</b>     |
| Hugo          | ITH            | 5.0016966                                  | 0.8787699                 | 1.832                       | 0.067              |
| Hugo          | TMB            | 0.9991061                                  | 0.0006954                 | -1.286                      | 0.198              |
| <b>Study</b>  | <b>feature</b> | <b>exp(coefficient)<br/>(Hazard Ratio)</b> | <b>standard<br/>error</b> | <b>Wald's<br/>statistic</b> | <b>p-value</b>     |
| Van Allen     | ITH            | 0.9569098                                  | 0.382274                  | -0.115                      | 0.908              |
| Van Allen     | TMB            | 0.9998826                                  | 0.0001625                 | -0.723                      | 0.47               |
| <b>Study</b>  | <b>feature</b> | <b>exp(coefficient)<br/>(Hazard Ratio)</b> | <b>standard<br/>error</b> | <b>Wald's<br/>statistic</b> | <b>Pmeta-value</b> |
| Meta-Analysis | ITH            | -                                          | -                         | -                           | 0.03881            |
| Meta-Analysis | TMB            | -                                          | -                         | -                           | 0.33259            |

**Supplementary Table 6. Multivariate cox regression analysis to test if ITH, Mutation load and CNV load are each associated with survival while controlling for confounding factors in Melanoma TCGA dataset. Related to STAR Methods.**

| <b>ITH</b>                                                                                                             |                               |                       |                                                             |                |
|------------------------------------------------------------------------------------------------------------------------|-------------------------------|-----------------------|-------------------------------------------------------------|----------------|
| $\lambda(t) = \lambda_0(t) \exp(\beta_1 * age + \beta_2 * stage + \beta_3 * purity + \beta_4 * ITH)$                   |                               |                       |                                                             |                |
| <b>feature</b>                                                                                                         | <b>regression coefficient</b> | <b>standard error</b> | <b>Wald's statistic</b>                                     | <b>p-value</b> |
| <b>stage</b>                                                                                                           | 1.100826                      | 0.026915              | 3.569                                                       | 0.000358       |
| <b>age</b>                                                                                                             | 1.021558                      | 0.006257              | 3.409                                                       | 0.000653       |
| <b>purity</b>                                                                                                          | 1.150923                      | 0.52276               | 0.269                                                       | 0.788015       |
| <b>ITH</b>                                                                                                             | 1.150773                      | 0.072552              | 1.936                                                       | 0.052915       |
| <b>Mutation Load</b>                                                                                                   |                               |                       |                                                             |                |
| $\lambda(t) = \lambda_0(t) \exp(\beta_1 * age + \beta_2 * stage + \beta_3 * load_{mut})$                               |                               |                       |                                                             |                |
| <b>feature</b>                                                                                                         | <b>regression coefficient</b> | <b>standard error</b> | <b>Wald's statistic</b>                                     | <b>p-value</b> |
| <b>stage</b>                                                                                                           | 1.097798927                   | 0.0295909             | 3.153                                                       | 0.001615       |
| <b>age</b>                                                                                                             | 1.025529947                   | 0.0070752             | 3.563                                                       | 0.000367       |
| <b>mutation load</b>                                                                                                   | 0.999850011                   | 0.0001737             | -0.863                                                      | 0.388043       |
| <b>CNV load</b>                                                                                                        |                               |                       |                                                             |                |
| $\lambda(t) = \lambda_0(t) \exp(\beta_1 * age + \beta_2 * stage + \beta_3 * load_{cnv})$                               |                               |                       |                                                             |                |
| <b>feature</b>                                                                                                         | <b>regression coefficient</b> | <b>standard error</b> | <b>Wald's statistic</b>                                     | <b>p-value</b> |
| <b>stage</b>                                                                                                           | 1.099066299                   | 0.026886              | 3.513                                                       | 0.000443       |
| <b>age</b>                                                                                                             | 1.024565889                   | 0.006162              | 3.613                                                       | 0.000303       |
| <b>CNV load</b>                                                                                                        | 0.837393657                   | 0.329976              | -0.538                                                      | 0.590715       |
| <b>likelihood ratio analysis to test if ITH contributes to survival differences while controlling for tumor purity</b> |                               |                       |                                                             |                |
| <b>model</b>                                                                                                           | <b>log likelihood</b>         |                       | P-value associated with increase in log-likelihood = 0.0257 |                |
| <b>Survival ~ purity</b>                                                                                               | -683.71                       |                       |                                                             |                |
| <b>Survival ~ purity + ITH</b>                                                                                         | -681.11                       |                       |                                                             |                |

**Supplementary Table 7. Related to Figure 6. Percentage of Clonal (shared between all SCCs), Subclonal (shared among a subset of the SCCs), and Private mutations among the 6 and 12 SCC mixes described in Figure 6C-F.**

|                                                                                     | <b>6WB</b>   | <b>6AB</b>   | <b>12WB</b>  | <b>12AB</b>  |
|-------------------------------------------------------------------------------------|--------------|--------------|--------------|--------------|
| <b>Clonal</b>                                                                       | <b>12.31</b> | <b>2.82</b>  | <b>6.44</b>  | <b>1.55</b>  |
| <b>Subclonal</b>                                                                    | <b>6.62</b>  | <b>15.84</b> | <b>8.90</b>  | <b>26.48</b> |
| <b>Private</b>                                                                      | <b>81.07</b> | <b>81.34</b> | <b>84.67</b> | <b>71.97</b> |
| <b>Total</b>                                                                        | <b>100</b>   | <b>100</b>   | <b>100</b>   | <b>100</b>   |
| $\% \left( \frac{\textit{Clonal}}{\textit{Clonal} + \textit{Subclonal}} \right)$    | 65           | 15           | 42           | 5            |
| $\% \left( \frac{\textit{Subclonal}}{\textit{Clonal} + \textit{Subclonal}} \right)$ | 35           | 85           | 58           | 95           |
